# Supplementary material
Source: publisher site journal article supplement (https://www.dovepress.com/article/282334)
Supplement: Supplementary file 1 [file get_supplementary_file.php]

## Supplementary Figure legends

**Supplementary Figure S1. Physalis alkekengi var. franchetii extracts inhibited STAT3 activation in NSCLC and MM cells.** Three NSCLC cell lines (A) and three MM cell lines (B) were treated with physalins for 4 h. The levels of p-STAT3-Tyr, STAT3 and  $\beta$ -actin were detected by western blot analysis.

**Supplementary Figure S2. STAT3 knockdown repressed the downstream antiapoptotic proteins induced by STAT3.** NCI-H1975 cells were transfected with scrambled siRNA or siSTAT3 for 24 h, and the levels of p-STAT3-Tyr, STAT3, Bcl2, XIAP and  $\beta$ -actin were detected by western blot analysis.

**Supplementary Figure S3. The combination of the physalins increased the cell apoptosis rate and inhibited STAT3 activation.** (A) NCI-H1975 cells were treated with physalin A, physalin O or physalin L separately (3.9  $\mu$ g/ml, 7.8  $\mu$ g/ml and 1.9  $\mu$ g/ml) or together for 24 h, and Annexin V-FITC/PI assays were performed with flow cytometric analysis. (B) NCI-H1975 cells were treated with physalin A, physalin O or physalin L separately (3.9  $\mu$ g/ml, 7.8  $\mu$ g/ml and 1.9  $\mu$ g/ml) or together for 4 h. The levels of p-STAT3-Tyr, STAT3 and  $\beta$ -actin were detected by western blot analysis.

Suppl. Fig. S1

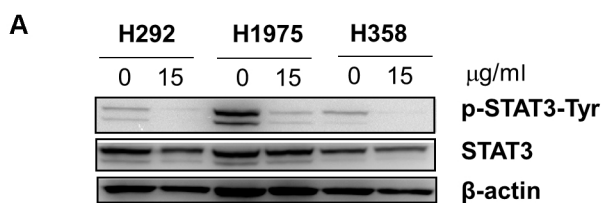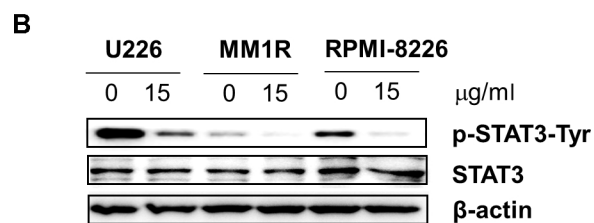

Suppl. Fig. S2

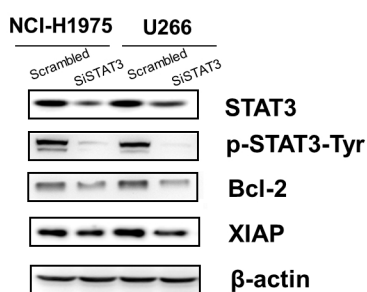

Suppl. Fig. S3

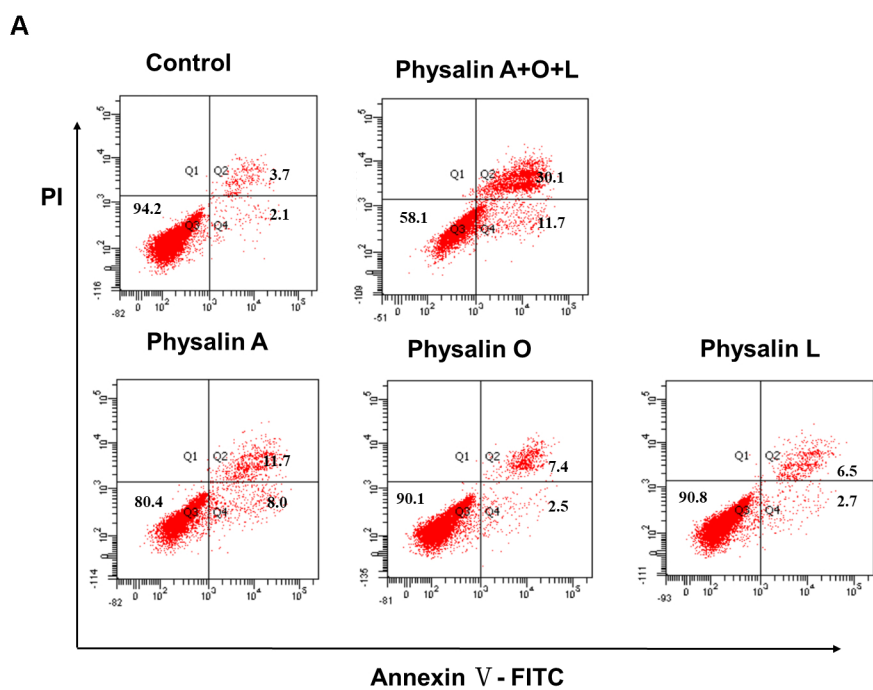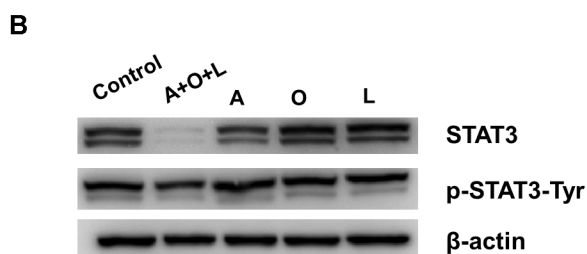

**Supplementary Table 1.** Inspection report of *Physalis alkekengi var. franchetii*.

Hangzhou Huadong Chinese crude Co.

**Inspection Report**

Report No. C151229-6

No. RD-02-008-00

|                     |                                                                                                |                           |                              |
|---------------------|------------------------------------------------------------------------------------------------|---------------------------|------------------------------|
| <b>Product Name</b> | Physalis alkekengi<br>var. franchetii                                                          | <b>Specification</b>      | Crude drug                   |
| <b>Origin</b>       | Shangdong                                                                                      | <b>Date in Produced</b>   | 2015/12/27                   |
| <b>Lot No.</b>      | 151227                                                                                         | <b>Number of samples</b>  | 100g                         |
| <b>Provider</b>     | General drug<br>materials<br>production area                                                   | <b>Packaging</b>          | Polyethylene<br>plastic tape |
| <b>Test Purpose</b> | Quality inspection                                                                             | <b>Check List No.</b>     | C151227-1                    |
| Test Item           | All items                                                                                      | <b>Sample Tested Date</b> | 2015/12/29                   |
| Test standard       | <i>Zhejiang traditional Chinese medicine processing standard (2005 Edition, QS-01-0000-03)</i> | <b>Report Date</b>        | 2015/12/29                   |

**Test Item**

**Standard order**

**Test results**

[Qualitative character]

Meet the requirements

Meet the requirements

[Residual sulfur dioxide]

<150mg/kg

Not detected

**Test conclusion:** According to *Zhejiang traditional Chinese medicine processing standard (2005 Edition, QS-01-0000-03)*, this product passed standard tests.
